# Supplementary material
Source: PubMed Central journal article supplement (PMC428465)

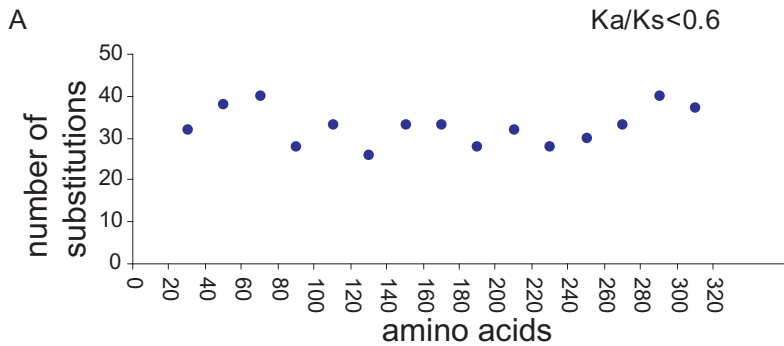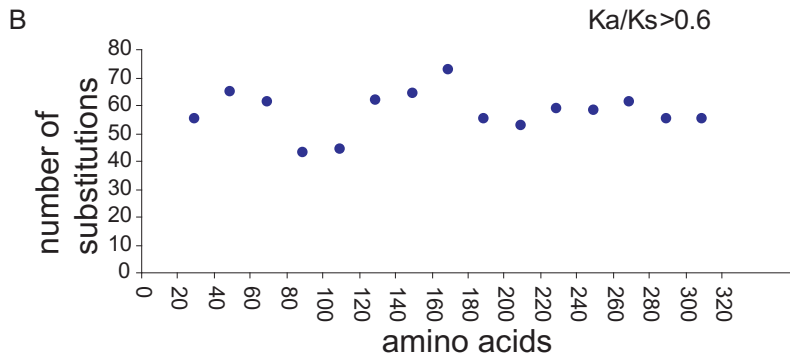

Supplement: pnas_101_24_9019__1.pdf [file pnas_101_24_9019__1.pdf]
